# Supplementary material for: OmpF Downregulation Mediated by Sigma E or OmpR Activation Confers Cefalexin Resistance in Escherichia coli in the Absence of Acquired β-Lactamases
Source: bioRxiv or medRxiv preprint supplement (doi:10.1101/2021.05.16.444350), 2021-05-17

Supplementary Information for:

**OmpF Downregulation Mediated by Activation of Sigma E or OmpR Mutation  
Confers Cefalexin Resistance in *Escherichia coli* in the Absence of Acquired  $\beta$ -  
Lactamases.**

**Maryam ALZAYN<sup>1,2</sup>, Punyawee DULYAYANGKUL<sup>1</sup>, Naphat SATAPOOMIN<sup>1</sup>, Kate J.  
HEESOM<sup>3</sup>, Matthew B. AVISON<sup>1\*</sup>**

**<sup>1</sup>School of Cellular & Molecular Medicine, University of Bristol, Bristol, UK**

**<sup>2</sup>Biology Department, Faculty of Science, Princess Nourah Bint Abdulrahman  
University, Riyadh, Saudi Arabia**

**<sup>3</sup>University of Bristol Proteomics Facility, Bristol, UK**

**\* Correspondence to: School of Cellular & Molecular Medicine, University of Bristol,  
Bristol, United Kingdom. [matthewb.avison@bris.ac.uk](mailto:matthewb.avison@bris.ac.uk)**

**Table S1: Proteomics data for EC17 and its cefalexin resistant mutant.**

| Accession | Gene        | EC17 | EC17 | EC17 | EC17 (M) | EC17 (M) | EC17 (M) | T. test | Fold change |
|-----------|-------------|------|------|------|----------|----------|----------|---------|-------------|
| P0A6L4    | <i>nanA</i> | 0.02 | 0.02 | 0.03 | 0        | 0        | 0        | <0.01   | <0.01       |
| P09323    | <i>nagE</i> | 0.04 | 0.06 | 0.05 | 0        | 0        | 0        | <0.01   | <0.01       |
| P24215    | <i>uxuA</i> | 0.02 | 0.03 | 0.02 | 0        | 0        | 0        | <0.01   | <0.01       |
| P08244    | <i>pyrF</i> | 0.02 | 0.05 | 0.03 | 0        | 0        | 0        | <0.01   | <0.01       |
| P0A830    | <i>dctA</i> | 0.05 | 0.13 | 0.08 | 0        | 0        | 0        | 0.01    | <0.01       |
| P06971    | <i>fhuA</i> | 0.05 | 0.08 | 0.1  | 0        | 0.02     | 0.01     | 0.01    | 0.14        |
| P06129    | <i>btuB</i> | 0.24 | 0.07 | 0.11 | 0        | 0.05     | 0.02     | 0.04    | 0.17        |
| P37617    | <i>zntA</i> | 0.01 | 0.02 | 0.03 | 0        | 0.01     | 0        | 0.03    | 0.22        |
| P0A927    | <i>tsx</i>  | 0.13 | 0.15 | 0.15 | 0        | 0.07     | 0.04     | <0.01   | 0.27        |
| P21420    | <i>nmpC</i> | 2.61 | 3.18 | 3.13 | 0.7      | 1.07     | 0.67     | <0.01   | 0.27        |
| P33650    | <i>feoB</i> | 0.27 | 0.12 | 0.15 | 0        | 0.08     | 0.07     | 0.03    | 0.27        |
| P39396    | <i>yjiY</i> | 0.58 | 0.87 | 0.76 | 0.08     | 0.34     | 0.23     | <0.01   | 0.29        |
| P0A9Q1    | <i>arcA</i> | 0.94 | 0.5  | 0.59 | 0        | 0.35     | 0.31     | 0.03    | 0.33        |
| P02931    | <i>ompF</i> | 1.34 | 1.26 | 0.86 | 0.69     | 0.31     | 0.17     | 0.01    | 0.34        |
| P31554    | <i>lptD</i> | 0.05 | 0.09 | 0.06 | 0        | 0.04     | 0.02     | 0.03    | 0.34        |
| P37626    | <i>yhil</i> | 0.03 | 0.04 | 0.04 | 0        | 0.02     | 0.02     | 0.03    | 0.37        |
| P0AFI7    | <i>pdxH</i> | 0.03 | 0.05 | 0.06 | 0        | 0.03     | 0.02     | 0.04    | 0.38        |
| P60240    | <i>rapA</i> | 0.03 | 0.05 | 0.05 | 0        | 0.02     | 0.03     | 0.04    | 0.38        |
| P0ACR9    | <i>mprA</i> | 0.08 | 0.09 | 0.08 | 0        | 0.04     | 0.05     | 0.02    | 0.4         |
| P33937    | <i>napA</i> | 0.05 | 0.06 | 0.1  | 0.03     | 0.03     | 0.04     | 0.04    | 0.42        |
| P37440    | <i>ucpA</i> | 0.1  | 0.17 | 0.14 | 0.04     | 0.08     | 0.05     | 0.01    | 0.43        |
| P0AEE5    | <i>mgIB</i> | 0.1  | 0.14 | 0.12 | 0.03     | 0.09     | 0.05     | 0.01    | 0.46        |
| P0AC02    | <i>bamD</i> | 0.07 | 0.07 | 0.05 | 0.16     | 0.12     | 0.09     | 0.01    | 2.07        |
| P62620    | <i>ispG</i> | 0.07 | 0.08 | 0.07 | 0.12     | 0.22     | 0.13     | 0.03    | 2.13        |
| P0COL7    | <i>proP</i> | 0.05 | 0.06 | 0    | 0.07     | 0.1      | 0.08     | 0.04    | 2.25        |
| P0A991    | <i>fbaB</i> | 0.07 | 0.15 | 0.13 | 0.17     | 0.56     | 0.41     | 0.04    | 3.33        |
| P0A9W9    | <i>yrdA</i> | 0.02 | 0    | 0    | 0.02     | 0.02     | 0.02     | 0.03    | 3.78        |
| P0AEW6    | <i>gsk</i>  | 0    | 0    | 0.03 | 0.03     | 0.05     | 0.03     | 0.04    | 4.04        |
| P0COV0    | <i>degP</i> | 0.12 | 0.18 | 0.21 | 0.68     | 0.94     | 0.59     | <0.01   | 4.35        |
| P76372    | <i>wzzB</i> | 0.02 | 0    | 0    | 0.01     | 0.04     | 0.03     | 0.04    | 5.39        |
| P0AFH8    | <i>osmY</i> | 0.04 | 0.05 | 0    | 0.09     | 0.28     | 0.24     | 0.02    | 7.05        |
| P21169    | <i>speC</i> | 0    | 0.01 | 0    | 0.03     | 0.05     | 0.04     | <0.01   | 22.74       |
| P0ADT8    | <i>ygiM</i> | 0    | 0    | 0    | 0.05     | 0.07     | 0.07     | <0.01   | >20         |
| P76402    | <i>yegP</i> | 0    | 0    | 0    | 0.05     | 0.05     | 0.07     | <0.01   | >20         |
| P76187    | <i>ydhF</i> | 0    | 0    | 0    | 0.02     | 0.06     | 0.04     | 0.01    | >20         |

**Table S2: Proteomics data for ATCC25922 and its cefalexin resistant mutant.**

| Accession | Gene        | ATCC 25922 | ATCC 25922 | ATCC 25922 | ATCC 25922 (M) | ATCC 25922 (M) | ATCC 25922 (M) | T. test | Fold change |
|-----------|-------------|------------|------------|------------|----------------|----------------|----------------|---------|-------------|
| P0CG19    | <i>rph</i>  | 0.06       | 0.07       | 0.06       | 0              | 0              | 0              | <0.01   | <0.01       |
| P13024    | <i>fdhE</i> | 0.05       | 0.04       | 0.05       | 0              | 0              | 0              | <0.01   | <0.01       |
| P29012    | <i>dadX</i> | 0.05       | 0.04       | 0.04       | 0              | 0              | 0              | <0.01   | <0.01       |
| P0A8J4    | <i>ybeD</i> | 0.04       | 0.04       | 0.04       | 0              | 0              | 0              | <0.01   | <0.01       |
| P33025    | <i>psuG</i> | 0.04       | 0.04       | 0.04       | 0              | 0              | 0              | <0.01   | <0.01       |
| P0AEB7    | <i>yoaB</i> | 0.04       | 0.04       | 0.04       | 0              | 0              | 0              | <0.01   | <0.01       |
| P23894    | <i>htpX</i> | 0.05       | 0.06       | 0.05       | 0              | 0              | 0              | <0.01   | <0.01       |
| P02943    | <i>lamB</i> | 0.07       | 0.09       | 0.08       | 0              | 0              | 0              | <0.01   | <0.01       |
| P0AG24    | <i>spoT</i> | 0.01       | 0.01       | 0.01       | 0              | 0              | 0              | <0.01   | <0.01       |
| P76372    | <i>wzzB</i> | 0.06       | 0.04       | 0.05       | 0              | 0              | 0              | <0.01   | <0.01       |
| P0ACQ4    | <i>oxyR</i> | 0.03       | 0.02       | 0.02       | 0              | 0              | 0              | <0.01   | <0.01       |
| P30871    | <i>ygiF</i> | 0.05       | 0.04       | 0.03       | 0              | 0              | 0              | <0.01   | <0.01       |
| P05042    | <i>fumC</i> | 0.03       | 0.05       | 0.05       | 0              | 0              | 0              | <0.01   | <0.01       |
| P0ADU2    | <i>ygiN</i> | 0.1        | 0.1        | 0.15       | 0              | 0              | 0              | <0.01   | <0.01       |
| P0AEN8    | <i>fucU</i> | 0.06       | 0.08       | 0.1        | 0              | 0              | 0              | <0.01   | <0.01       |
| P37665    | <i>yiaD</i> | 0.03       | 0.04       | 0.02       | 0              | 0              | 0              | <0.01   | <0.01       |
| P25553    | <i>aldA</i> | 0.11       | 0.07       | 0.07       | 0              | 0              | 0              | <0.01   | <0.01       |
| P0A951    | <i>speG</i> | 0.07       | 0.07       | 0.04       | 0              | 0              | 0              | <0.01   | <0.01       |
| P0AAG8    | <i>mglA</i> | 0.02       | 0.01       | 0.01       | 0              | 0              | 0              | <0.01   | <0.01       |
| P0ADB1    | <i>osmE</i> | 0.07       | 0.06       | 0.04       | 0              | 0              | 0              | <0.01   | <0.01       |
| P0AA53    | <i>qmcA</i> | 0.02       | 0.02       | 0.01       | 0              | 0              | 0              | <0.01   | <0.01       |
| P0A6U8    | <i>glgA</i> | 0.07       | 0.03       | 0.06       | 0              | 0              | 0              | <0.01   | <0.01       |
| P64429    | <i>ypfJ</i> | 0.01       | 0.01       | 0.01       | 0              | 0              | 0              | <0.01   | <0.01       |
| P00934    | <i>thrC</i> | 0.05       | 0.03       | 0.02       | 0              | 0              | 0              | 0.01    | <0.01       |
| P0ABQ2    | <i>garR</i> | 0.05       | 0.12       | 0.1        | 0              | 0              | 0              | 0.01    | <0.01       |
| P00561    | <i>thrA</i> | 0.04       | 0.02       | 0.05       | 0              | 0              | 0              | 0.01    | <0.01       |
| P08506    | <i>dacC</i> | 0.05       | 0.02       | 0.04       | 0              | 0              | 0              | 0.01    | <0.01       |
| P0AB91    | <i>aroG</i> | 0.05       | 0.02       | 0.03       | 0              | 0              | 0              | 0.01    | <0.01       |
| P0A6N4    | <i>efp</i>  | 0.15       | 0.28       | 0.12       | 0              | 0              | 0              | 0.01    | <0.01       |
| P60757    | <i>hisG</i> | 0.07       | 0.04       | 0.03       | 0              | 0              | 0              | 0.01    | <0.01       |
| P0ADX1    | <i>yhfA</i> | 0.02       | 0.01       | 0.01       | 0              | 0              | 0              | 0.01    | <0.01       |
| P39180    | <i>flu</i>  | 0.07       | 0.05       | 0.14       | 0              | 0              | 0              | 0.01    | <0.01       |
| P08192    | <i>folC</i> | 0.04       | 0.04       | 0.09       | 0              | 0              | 0              | 0.02    | <0.01       |
| P37902    | <i>gltI</i> | 0.16       | 0.13       | 0.04       | 0              | 0              | 0              | 0.02    | <0.01       |
| P33232    | <i>lldD</i> | 0.34       | 0.19       | 0.11       | 0              | 0              | 0              | 0.02    | <0.01       |
| Q46845    | <i>yghU</i> | 0.03       | 0.01       | 0.01       | 0              | 0              | 0              | 0.02    | <0.01       |
| P25516    | <i>acnA</i> | 0.05       | 0.02       | 0.02       | 0              | 0              | 0              | 0.03    | <0.01       |
| P77748    | <i>ydiJ</i> | 0.03       | 0.01       | 0.01       | 0              | 0              | 0              | 0.04    | <0.01       |
| P28903    | <i>nrdD</i> | 0.27       | 0.14       | 0.23       | 0              | 0              | 0.02           | <0.01   | 0.04        |
| P21420    | <i>nmpC</i> | 3.21       | 2.66       | 3.13       | 0.28           | 0.17           | 0.19           | <0.01   | 0.07        |
| P0A830    | <i>dctA</i> | 0.16       | 0.12       | 0.16       | 0              | 0              | 0.04           | <0.01   | 0.08        |
| P06987    | <i>hisB</i> | 0.06       | 0.05       | 0.04       | 0              | 0.01           | 0              | <0.01   | 0.08        |
| P23827    | <i>eco</i>  | 0.21       | 0.12       | 0.1        | 0              | 0              | 0.04           | 0.01    | 0.09        |

|        |             |      |      |      |      |      |      |       |      |
|--------|-------------|------|------|------|------|------|------|-------|------|
| P0A9Q1 | <i>arcA</i> | 0.47 | 0.83 | 0.63 | 0.06 | 0.06 | 0.08 | <0.01 | 0.1  |
| P07762 | <i>glgB</i> | 0.05 | 0.05 | 0.07 | 0    | 0    | 0.02 | <0.01 | 0.11 |
| P23836 | <i>phoP</i> | 0.04 | 0.06 | 0.04 | 0    | 0    | 0.02 | 0.01  | 0.13 |
| P0ABU5 | <i>elbB</i> | 0.14 | 0.13 | 0.1  | 0    | 0.05 | 0    | <0.01 | 0.13 |
| P0ABH0 | <i>ftsA</i> | 0.04 | 0.04 | 0.05 | 0    | 0    | 0.02 | <0.01 | 0.13 |
| P0A7B1 | <i>ppk</i>  | 0.03 | 0.01 | 0.03 | 0    | 0    | 0.01 | 0.02  | 0.14 |
| P04425 | <i>gshB</i> | 0.05 | 0.04 | 0.04 | 0    | 0.02 | 0    | <0.01 | 0.14 |
| P39160 | <i>uxuB</i> | 0.02 | 0.06 | 0.03 | 0    | 0    | 0.02 | 0.03  | 0.14 |
| P06996 | <i>ompC</i> | 1.64 | 1.21 | 2.12 | 0.18 | 0.21 | 0.34 | <0.01 | 0.15 |
| P0AC19 | <i>folX</i> | 0.05 | 0.08 | 0.09 | 0    | 0    | 0.03 | 0.01  | 0.15 |
| P02931 | <i>ompF</i> | 1.89 | 1.59 | 1.6  | 0.56 | 0.15 | 0.15 | <0.01 | 0.17 |
| P0A910 | <i>ompA</i> | 4.82 | 5.6  | 6.24 | 1.32 | 0.75 | 0.92 | <0.01 | 0.18 |
| P0A7J0 | <i>ribB</i> | 0.09 | 0.16 | 0.06 | 0    | 0    | 0.06 | 0.03  | 0.18 |
| P0AE12 | <i>amn</i>  | 0.03 | 0.02 | 0.04 | 0    | 0.01 | 0    | 0.02  | 0.18 |
| P75823 | <i>ltaE</i> | 0.11 | 0.06 | 0.1  | 0    | 0.02 | 0.03 | 0.01  | 0.19 |
| P0AB67 | <i>pntB</i> | 0.08 | 0.05 | 0.09 | 0    | 0.02 | 0.03 | 0.01  | 0.2  |
| P0A9Z1 | <i>glnB</i> | 0.05 | 0.06 | 0.08 | 0    | 0    | 0.04 | 0.01  | 0.2  |
| P0A917 | <i>ompX</i> | 0.81 | 1.15 | 0.94 | 0.39 | 0.11 | 0.11 | <0.01 | 0.21 |
| P62517 | <i>mdoH</i> | 0.04 | 0.03 | 0.05 | 0    | 0    | 0.03 | 0.02  | 0.21 |
| P0A6W9 | <i>gshA</i> | 0.04 | 0.02 | 0.04 | 0    | 0    | 0.02 | 0.03  | 0.22 |
| P0AFL3 | <i>ppiA</i> | 0.05 | 0.06 | 0.03 | 0    | 0    | 0.03 | 0.02  | 0.22 |
| P0ABH7 | <i>gltA</i> | 2.28 | 1.37 | 0.97 | 0.23 | 0.43 | 0.38 | 0.02  | 0.22 |
| P0AC33 | <i>fumA</i> | 0.4  | 0.47 | 0.78 | 0.05 | 0.18 | 0.15 | 0.01  | 0.23 |
| P0A6J5 | <i>dadA</i> | 0.21 | 0.14 | 0.14 | 0.02 | 0.05 | 0.04 | <0.01 | 0.23 |
| P28304 | <i>qorA</i> | 0.06 | 0.04 | 0.05 | 0    | 0    | 0.03 | 0.02  | 0.23 |
| P77376 | <i>ydjJ</i> | 0.04 | 0.02 | 0.03 | 0    | 0    | 0.02 | 0.03  | 0.24 |
| P0A6V1 | <i>glgC</i> | 0.17 | 0.06 | 0.12 | 0.02 | 0.02 | 0.04 | 0.02  | 0.24 |
| P39831 | <i>ydfG</i> | 0.09 | 0.09 | 0.09 | 0    | 0    | 0.07 | 0.02  | 0.25 |
| P32131 | <i>hemN</i> | 0.02 | 0.02 | 0.01 | 0    | 0    | 0.01 | 0.03  | 0.25 |
| P09546 | <i>putA</i> | 0.27 | 0.1  | 0.15 | 0.02 | 0.06 | 0.05 | 0.03  | 0.25 |
| P0A9M5 | <i>gpt</i>  | 0.07 | 0.07 | 0.05 | 0    | 0    | 0.05 | 0.03  | 0.26 |
| P0A915 | <i>ompW</i> | 1.22 | 0.59 | 0.48 | 0    | 0.33 | 0.27 | 0.04  | 0.26 |
| P0A8E1 | <i>ycfP</i> | 0.06 | 0.08 | 0.1  | 0.03 | 0.03 | 0    | 0.01  | 0.27 |
| P0A905 | <i>slyB</i> | 0.45 | 0.5  | 0.6  | 0.15 | 0.11 | 0.15 | <0.01 | 0.27 |
| P0ABI4 | <i>corA</i> | 0.06 | 0.04 | 0.06 | 0    | 0    | 0.04 | 0.03  | 0.27 |
| P0AB38 | <i>lpoB</i> | 0.04 | 0.05 | 0.03 | 0    | 0    | 0.03 | 0.04  | 0.28 |
| P27306 | <i>sthA</i> | 0.16 | 0.08 | 0.14 | 0    | 0.05 | 0.06 | 0.02  | 0.28 |
| P52697 | <i>pgl</i>  | 0.1  | 0.07 | 0.07 | 0    | 0    | 0.07 | 0.04  | 0.28 |
| P0A908 | <i>mipA</i> | 0.09 | 0.17 | 0.08 | 0.05 | 0    | 0.05 | 0.04  | 0.3  |
| P0A7S3 | <i>rpsL</i> | 0.44 | 0.37 | 0.17 | 0.11 | 0.18 | 0    | 0.04  | 0.3  |
| P68767 | <i>pepA</i> | 0.17 | 0.09 | 0.15 | 0    | 0.06 | 0.07 | 0.02  | 0.31 |
| P61889 | <i>mdh</i>  | 2.49 | 2.39 | 1.96 | 0.57 | 0.73 | 0.81 | <0.01 | 0.31 |
| P60560 | <i>guaC</i> | 0.14 | 0.09 | 0.15 | 0    | 0.05 | 0.06 | 0.02  | 0.31 |
| P29680 | <i>hemE</i> | 0.08 | 0.05 | 0.08 | 0    | 0.03 | 0.04 | 0.01  | 0.32 |
| P30177 | <i>ybiB</i> | 0.07 | 0.05 | 0.06 | 0.03 | 0    | 0.03 | 0.01  | 0.32 |
| P37626 | <i>yhil</i> | 0.06 | 0.03 | 0.06 | 0.02 | 0    | 0.03 | 0.04  | 0.34 |
| P0AC41 | <i>sdhA</i> | 1.22 | 0.55 | 0.93 | 0.19 | 0.37 | 0.37 | 0.02  | 0.35 |

|        |             |      |      |      |      |      |      |       |       |
|--------|-------------|------|------|------|------|------|------|-------|-------|
| P37903 | <i>uspF</i> | 0.28 | 0.23 | 0.17 | 0.07 | 0.09 | 0.08 | <0.01 | 0.36  |
| P0ABK5 | <i>cysK</i> | 0.48 | 0.24 | 0.27 | 0.19 | 0.1  | 0.07 | 0.03  | 0.37  |
| P17445 | <i>betB</i> | 0.12 | 0.06 | 0.09 | 0    | 0.05 | 0.05 | 0.04  | 0.37  |
| P31142 | <i>sseA</i> | 0.14 | 0.14 | 0.1  | 0    | 0.05 | 0.1  | 0.04  | 0.38  |
| P0AED0 | <i>uspA</i> | 0.23 | 0.32 | 0.23 | 0    | 0.13 | 0.17 | 0.03  | 0.38  |
| P25524 | <i>codA</i> | 0.06 | 0.03 | 0.06 | 0    | 0.03 | 0.03 | 0.03  | 0.39  |
| P07014 | <i>sdhB</i> | 0.37 | 0.48 | 0.44 | 0.18 | 0.14 | 0.18 | <0.01 | 0.39  |
| P0AGE9 | <i>sucD</i> | 1.16 | 1.3  | 1.53 | 0.49 | 0.45 | 0.62 | <0.01 | 0.39  |
| P0AG16 | <i>purF</i> | 0.25 | 0.11 | 0.22 | 0.03 | 0.11 | 0.09 | 0.04  | 0.39  |
| P15640 | <i>purD</i> | 0.17 | 0.15 | 0.23 | 0.04 | 0.06 | 0.12 | 0.01  | 0.4   |
| P24186 | <i>folD</i> | 0.11 | 0.15 | 0.17 | 0.07 | 0.07 | 0.04 | 0.01  | 0.4   |
| P0ACJ0 | <i>lrp</i>  | 0.15 | 0.16 | 0.09 | 0.05 | 0.06 | 0.05 | 0.01  | 0.4   |
| P33221 | <i>purT</i> | 0.24 | 0.26 | 0.28 | 0.07 | 0.13 | 0.12 | <0.01 | 0.4   |
| P0AG90 | <i>secD</i> | 0.46 | 0.4  | 0.75 | 0.1  | 0.3  | 0.28 | 0.03  | 0.41  |
| P0AG93 | <i>secF</i> | 0.04 | 0.06 | 0.07 | 0    | 0.03 | 0.04 | 0.04  | 0.42  |
| P0AFG6 | <i>sucB</i> | 1.17 | 0.75 | 1.26 | 0.28 | 0.44 | 0.6  | 0.01  | 0.42  |
| P0ABJ1 | <i>cyoA</i> | 0.48 | 0.4  | 0.48 | 0.09 | 0.18 | 0.29 | 0.01  | 0.42  |
| P0A988 | <i>dnaN</i> | 0.09 | 0.08 | 0.07 | 0    | 0.06 | 0.04 | 0.03  | 0.43  |
| P0A6I0 | <i>cmk</i>  | 0.12 | 0.11 | 0.16 | 0.05 | 0.05 | 0.07 | 0.01  | 0.44  |
| P0A912 | <i>pal</i>  | 0.53 | 0.63 | 0.38 | 0.32 | 0.17 | 0.22 | 0.01  | 0.46  |
| P13029 | <i>katG</i> | 0.42 | 0.27 | 0.44 | 0.11 | 0.17 | 0.25 | 0.02  | 0.46  |
| P0ABU0 | <i>menB</i> | 0.09 | 0.06 | 0.06 | 0.03 | 0.04 | 0.04 | 0.01  | 0.47  |
| P15254 | <i>purL</i> | 0.19 | 0.11 | 0.24 | 0.05 | 0.09 | 0.11 | 0.04  | 0.47  |
| P0AEE1 | <i>dcrB</i> | 0.17 | 0.17 | 0.13 | 0.07 | 0.06 | 0.09 | <0.01 | 0.48  |
| P0ADW3 | <i>yhcb</i> | 0.17 | 0.18 | 0.18 | 0.08 | 0.07 | 0.1  | <0.01 | 0.48  |
| P0A6T5 | <i>folE</i> | 0.11 | 0.15 | 0.13 | 0.07 | 0.06 | 0.06 | <0.01 | 0.48  |
| P0A853 | <i>tnaA</i> | 0.52 | 0.49 | 0.81 | 0.14 | 0.39 | 0.34 | 0.03  | 0.48  |
| P0ABJ9 | <i>cydA</i> | 0.54 | 0.36 | 0.65 | 0.1  | 0.33 | 0.33 | 0.04  | 0.49  |
| P39177 | <i>uspG</i> | 0.39 | 0.21 | 0.32 | 0.18 | 0.14 | 0.12 | 0.03  | 0.49  |
| P0AC02 | <i>bamD</i> | 0.05 | 0.08 | 0.04 | 0.09 | 0.13 | 0.12 | 0.01  | 2.09  |
| P0A6W5 | <i>greA</i> | 0.07 | 0.07 | 0    | 0.11 | 0.13 | 0.13 | 0.02  | 2.68  |
| P42630 | <i>tdcG</i> | 0.1  | 0.02 | 0.07 | 0.12 | 0.17 | 0.23 | 0.02  | 2.74  |
| P0A7T3 | <i>rpsP</i> | 0.44 | 0.21 | 0.32 | 0.98 | 0.84 | 0.91 | <0.01 | 2.83  |
| P0A6X7 | <i>ihfA</i> | 0.06 | 0.02 | 0.02 | 0.13 | 0.08 | 0.1  | 0.01  | 2.84  |
| P07017 | <i>tar</i>  | 0.1  | 0.04 | 0.05 | 0.12 | 0.19 | 0.26 | 0.02  | 2.93  |
| P07363 | <i>cheA</i> | 0.03 | 0.02 | 0.03 | 0.11 | 0.06 | 0.12 | 0.01  | 3.63  |
| P0AGE6 | <i>chrR</i> | 0.05 | 0    | 0    | 0.05 | 0.06 | 0.08 | 0.04  | 3.65  |
| P0AGF6 | <i>tdcB</i> | 0.06 | 0.05 | 0.22 | 0.26 | 0.36 | 0.62 | 0.03  | 3.75  |
| P45523 | <i>fkpA</i> | 0.12 | 0.06 | 0.07 | 0.24 | 0.32 | 0.38 | <0.01 | 3.9   |
| P0ADZ0 | <i>rplW</i> | 0.47 | 0    | 0    | 0.68 | 0.63 | 0.54 | 0.02  | 3.93  |
| P04949 | <i>fliC</i> | 1.36 | 0.35 | 0.55 | 2.51 | 3.44 | 3.98 | <0.01 | 4.4   |
| P0A6E6 | <i>atpC</i> | 0    | 0.04 | 0    | 0.09 | 0.05 | 0.06 | 0.02  | 4.71  |
| P0C0V0 | <i>degP</i> | 0.1  | 0.06 | 0.07 | 0.4  | 0.49 | 0.74 | 0.01  | 7.02  |
| P37648 | <i>yhjJ</i> | 0.01 | 0.01 | 0    | 0.03 | 0.06 | 0.07 | 0.01  | 7.04  |
| P0A800 | <i>rpoZ</i> | 0.03 | 0    | 0    | 0.06 | 0.06 | 0.09 | <0.01 | 8.16  |
| P0A9H9 | <i>cheZ</i> | 0.01 | 0    | 0    | 0.05 | 0.04 | 0.1  | 0.02  | 15.55 |
| P0ADT8 | <i>ygiM</i> | 0    | 0    | 0    | 0.08 | 0.1  | 0.1  | <0.01 | >20   |

|        |             |   |   |   |      |      |      |       |     |
|--------|-------------|---|---|---|------|------|------|-------|-----|
| POA7N9 | <i>rpmG</i> | 0 | 0 | 0 | 0.38 | 0.23 | 0.28 | <0.01 | >20 |
|--------|-------------|---|---|---|------|------|------|-------|-----|

**Table S3: Proteomics data for PSA and its cefalexin resistant mutant.**

| Accession | Gene        | PSA  | PSA  | PSA  | PSA (M) | PSA (M) | PSA (M) | T. test | Fold change |
|-----------|-------------|------|------|------|---------|---------|---------|---------|-------------|
| P21645    | <i>lpxD</i> | 0.06 | 0.07 | 0.07 | 0       | 0       | 0       | <0.01   | <0.01       |
| P77433    | <i>ykgG</i> | 0.05 | 0.05 | 0.04 | 0       | 0       | 0       | <0.01   | <0.01       |
| P31658    | <i>hchA</i> | 0.05 | 0.07 | 0.07 | 0       | 0       | 0       | <0.01   | <0.01       |
| P69922    | <i>fucl</i> | 0.02 | 0.03 | 0.04 | 0       | 0       | 0       | <0.01   | <0.01       |
| P29680    | <i>hemE</i> | 0.03 | 0.05 | 0.05 | 0       | 0       | 0       | <0.01   | <0.01       |
| P0AAJ8    | <i>hybA</i> | 0.02 | 0.03 | 0.04 | 0       | 0       | 0       | <0.01   | <0.01       |
| P24193    | <i>hypE</i> | 0.02 | 0.02 | 0.03 | 0       | 0       | 0       | <0.01   | <0.01       |
| P02931    | <i>ompF</i> | 0.15 | 0.21 | 0.32 | 0       | 0       | 0       | 0.01    | <0.01       |
| P0A7C6    | <i>pepE</i> | 0.05 | 0.03 | 0.07 | 0       | 0       | 0       | 0.01    | <0.01       |
| P04949    | <i>fliC</i> | 0.05 | 0.07 | 0.15 | 0       | 0       | 0       | 0.02    | <0.01       |
| P06996    | <i>ompC</i> | 3.96 | 6.61 | 7.23 | 0.1     | 0.22    | 0.2     | <0.01   | 0.03        |
| P25516    | <i>acnA</i> | 0.01 | 0.01 | 0.02 | 0       | 0       | 0       | <0.01   | 0.12        |
| P08194    | <i>glpT</i> | 0.03 | 0.03 | 0.03 | 0.01    | 0       | 0       | <0.01   | 0.14        |
| P11868    | <i>tdcD</i> | 0.09 | 0.08 | 0.2  | 0       | 0.02    | 0.04    | 0.03    | 0.17        |
| P0A9G6    | <i>aceA</i> | 0.04 | 0.03 | 0.08 | 0       | 0.03    | 0       | 0.04    | 0.19        |
| P13024    | <i>fdhE</i> | 0.03 | 0.05 | 0.04 | 0       | 0.02    | 0       | 0.02    | 0.2         |
| P0AAD6    | <i>sdaC</i> | 0.12 | 0.14 | 0.17 | 0.05    | 0.05    | 0       | <0.01   | 0.23        |
| P23721    | <i>serC</i> | 0.06 | 0.04 | 0.07 | 0       | 0.04    | 0       | 0.03    | 0.23        |
| P69786    | <i>ptsG</i> | 0.02 | 0.02 | 0.02 | 0       | 0       | 0.02    | 0.02    | 0.25        |
| P08192    | <i>folC</i> | 0.03 | 0.03 | 0.02 | 0       | 0.02    | 0       | 0.03    | 0.26        |
| P27830    | <i>rffG</i> | 0.02 | 0.03 | 0.03 | 0       | 0       | 0.02    | 0.04    | 0.27        |
| P13009    | <i>metH</i> | 0.02 | 0.04 | 0.04 | 0.01    | 0.01    | 0.01    | 0.01    | 0.28        |
| P0A9K9    | <i>slyD</i> | 0.17 | 0.14 | 0.16 | 0.13    | 0       | 0       | 0.03    | 0.28        |
| P63235    | <i>gadC</i> | 0.08 | 0.12 | 0.11 | 0       | 0.04    | 0.05    | 0.01    | 0.28        |
| P0AF08    | <i>mrp</i>  | 0.05 | 0.06 | 0.06 | 0.02    | 0.04    | 0       | 0.01    | 0.31        |
| P09152    | <i>narG</i> | 0.02 | 0.02 | 0.03 | 0.01    | 0       | 0.01    | 0.02    | 0.31        |
| P30744    | <i>sdaB</i> | 0.07 | 0.08 | 0.05 | 0.03    | 0.05    | 0       | 0.04    | 0.39        |
| P0DMC7    | <i>rcsB</i> | 0.07 | 0.08 | 0.08 | 0.05    | 0.04    | 0       | 0.02    | 0.39        |
| P46130    | <i>ybhC</i> | 0.08 | 0.12 | 0.14 | 0       | 0.05    | 0.08    | 0.04    | 0.4         |
| P21513    | <i>rne</i>  | 0.08 | 0.09 | 0.09 | 0       | 0.04    | 0.06    | 0.03    | 0.41        |
| P0A722    | <i>lpxA</i> | 0.07 | 0.07 | 0.07 | 0.03    | 0.06    | 0       | 0.04    | 0.42        |
| P00960    | <i>glyQ</i> | 0.1  | 0.1  | 0.13 | 0.06    | 0.08    | 0       | 0.04    | 0.42        |
| P25524    | <i>codA</i> | 0.04 | 0.06 | 0.05 | 0       | 0.03    | 0.03    | 0.04    | 0.43        |
| P0A8T7    | <i>rpoC</i> | 0.41 | 0.59 | 0.62 | 0.06    | 0.29    | 0.41    | 0.04    | 0.47        |
| P0C0V0    | <i>degP</i> | 0.05 | 0.08 | 0.06 | 0.01    | 0.04    | 0.04    | 0.04    | 0.49        |
| P0AEQ3    | <i>glnH</i> | 0.1  | 0.22 | 0.16 | 0.07    | 0.08    | 0.09    | 0.03    | 0.49        |
| P69908    | <i>gadA</i> | 0.58 | 0.78 | 0.88 | 0.18    | 0.51    | 0.42    | 0.02    | 0.5         |
| P69910    | <i>gadB</i> | 0.58 | 0.78 | 0.88 | 0.18    | 0.51    | 0.42    | 0.02    | 0.5         |
| P0A817    | <i>metK</i> | 0.21 | 0.19 | 0.19 | 0.07    | 0.11    | 0.11    | <0.01   | 0.5         |
| P0ACY1    | <i>ydjA</i> | 0.02 | 0.02 | 0    | 0.04    | 0.03    | 0.03    | 0.04    | 2.26        |
| P0AEQ6    | <i>glnP</i> | 0    | 0    | 0.03 | 0.04    | 0.03    | 0.03    | 0.04    | 3.4         |
| P45464    | <i>lpoA</i> | 0.03 | 0.03 | 0.04 | 0.11    | 0.13    | 0.11    | <0.01   | 3.65        |
| P39173    | <i>yeaD</i> | 0    | 0.04 | 0    | 0.04    | 0.07    | 0.06    | 0.04    | 3.73        |
| P0A8R0    | <i>rraA</i> | 0    | 0.05 | 0    | 0.08    | 0.05    | 0.07    | 0.03    | 3.9         |

|        |             |      |      |   |      |      |      |       |     |
|--------|-------------|------|------|---|------|------|------|-------|-----|
| P0AC19 | <i>folX</i> | 0    | 0.02 | 0 | 0.03 | 0.03 | 0.03 | 0.01  | 4.8 |
| P0ABD3 | <i>bfr</i>  | 0.04 | 0    | 0 | 0.08 | 0.1  | 0.1  | <0.01 | 6.7 |
| P08660 | <i>lysC</i> | 0    | 0    | 0 | 0.01 | 0.02 | 0.02 | <0.01 | >20 |



Figure S1: *ampC* promoter sequences of *E. coli* isolates and mutants

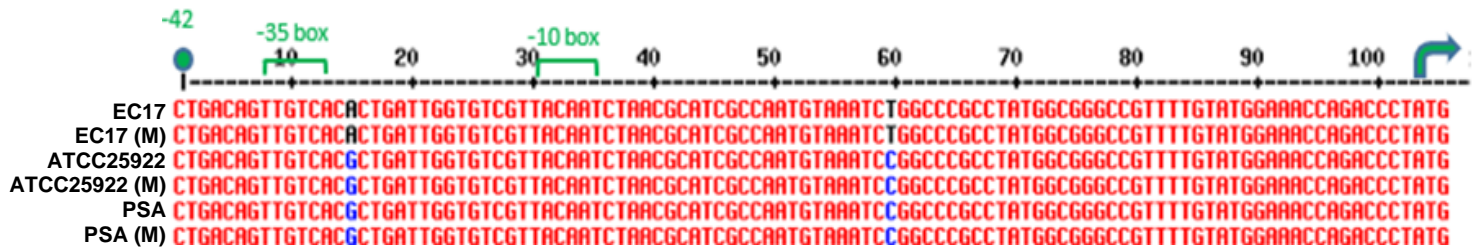

Supplement: Supplementary file [file media-1.pdf]
